# Supplementary material for: Interactions of Ru(ii) polypyridyl complexes with DNA mismatches and abasic sites
Source: Royal Society of Chemistry journal article supplement (doi:10.1039/c5dt00807g), 2015-01-01
Supplement: c5dt00807g1.pdf [file c5dt00807g1.pdf]

## **Interaction of Ru(II) polypyridyl complexes with DNA mismatches and Abasic Sites**

**T. Nandhini<sup>‡</sup>, K.R.Anju<sup>‡</sup>, V.Manikandamathavan<sup>¶</sup>, V.G. Vaidyanathan<sup>§,‡,\*</sup> and B.U. Nair<sup>¶</sup>**

*<sup>‡</sup>Biophysics Laboratory, <sup>§</sup>Academy of Scientific and Innovative Research (AcSIR) and <sup>¶</sup>Chemical Laboratory, CSIR-Central Leather Research Institute, Adyar, Chennai 600 020, India*

### **Hydrodynamic studies:**

Viscometric experiments were carried out using an Ostwald type viscometer with 5mL capacity in a thermostated water bath maintained at 25°C. The flow rates of the buffer (10mM), DNA (200μM) and DNA in the presence of varying concentrations of complexes (10-100μM) were measured with a manually operated timer. The experiments were carried out in triplicate with the error limit of ±0.2 sec. The relative viscosity was calculated according to the equation,

$$\eta = (t-t_0)/ t_0$$

where  $t_0$  is the flow time for the buffer and  $t$  is the observed flow time for DNA, in the presence and absence of the complexes. A plot of  $(\eta/\eta_0)^{1/3}$  Vs  $1/R$ , { $R = [DNA]/[complex]$ } was constructed from viscosity measurements.

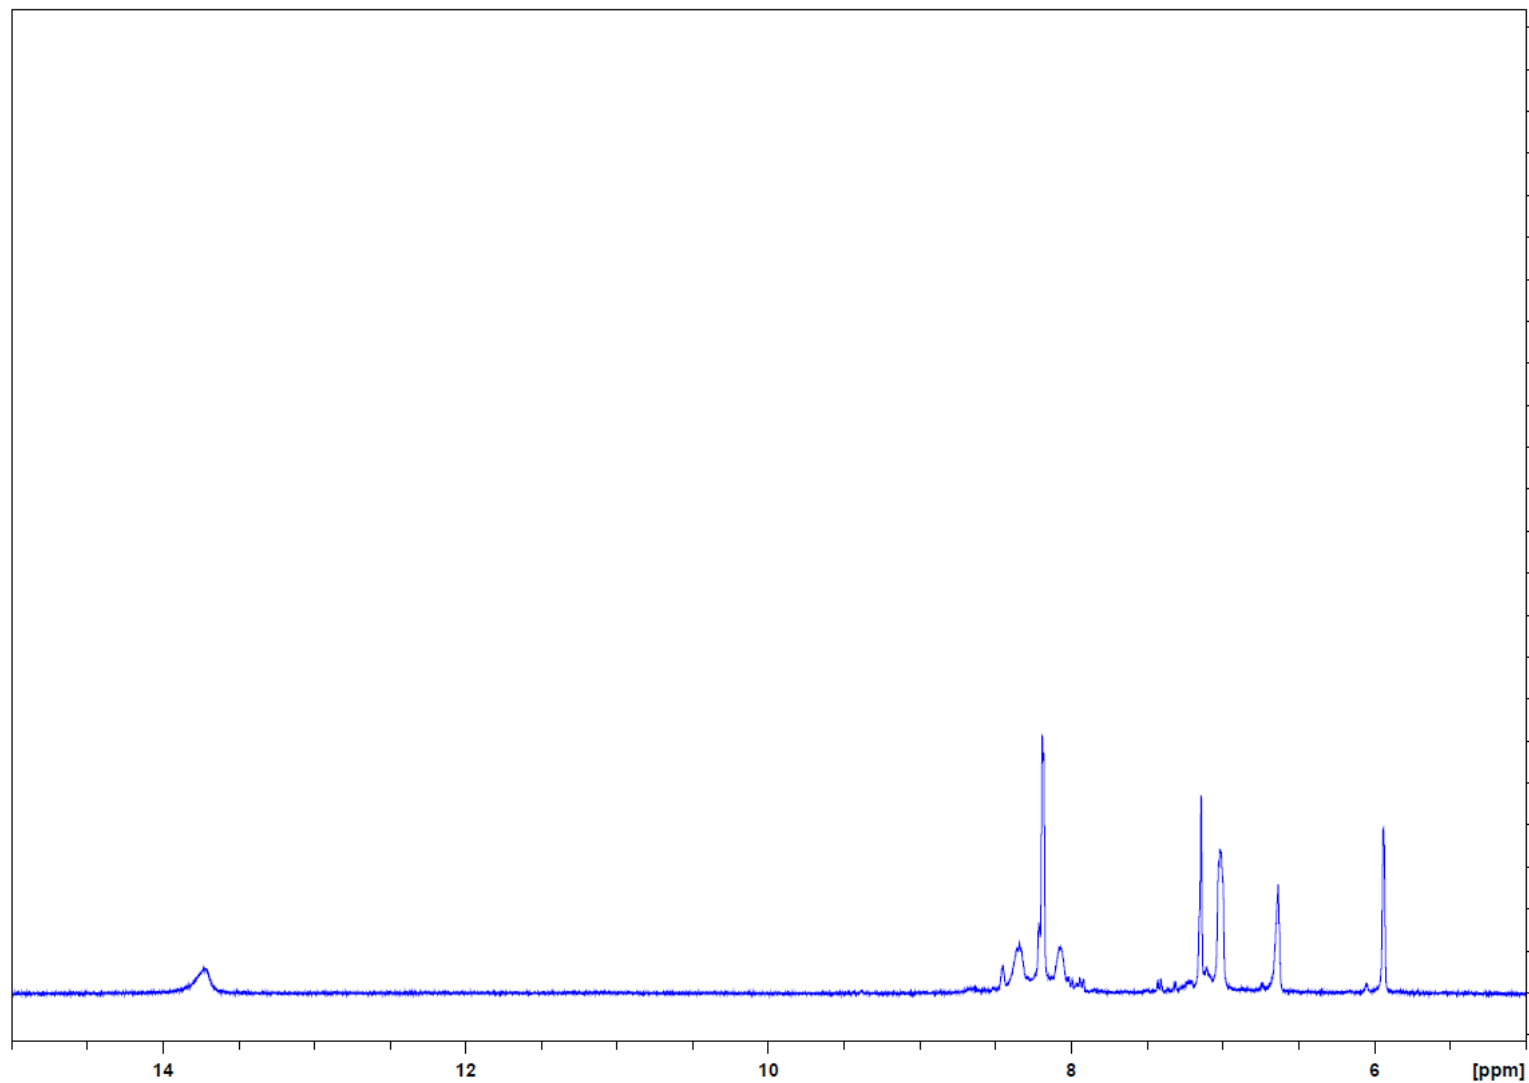

**Fig. S1**  $^1\text{H}$  NMR spectrum of Furphen (L1) in  $\text{d}^6$ - $\text{dmso}$

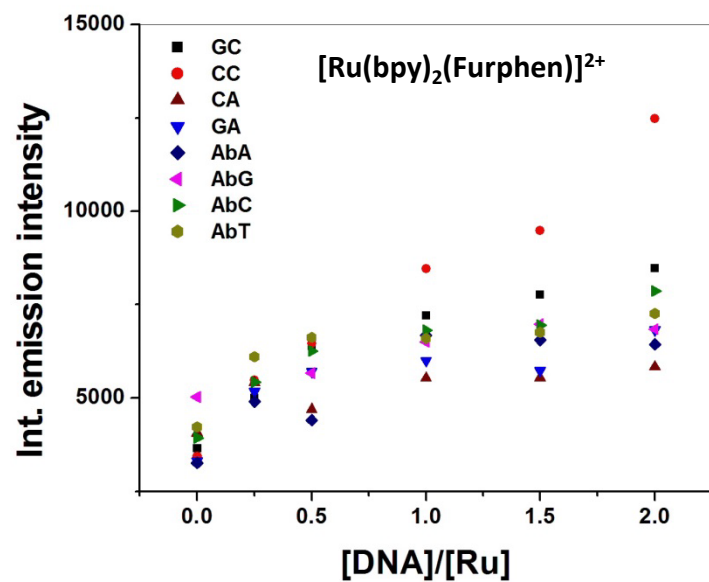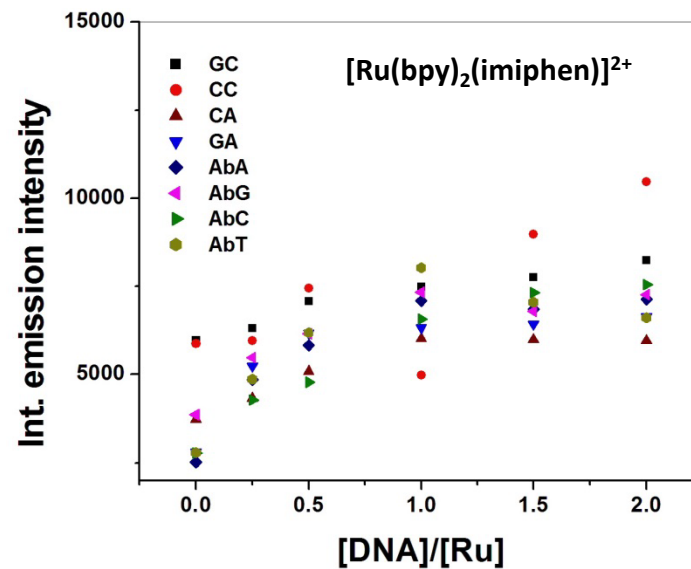

**Fig. S2** Integrated emission intensities of Ru complexes (a) complex 1 and (b) complex 2 in the presence of match, mismatch and abasic sites. [Ru]: 1  $\mu$ M; [Oligonucleotide]: 0-2  $\mu$ M. Error limit:  $\pm 5$  %

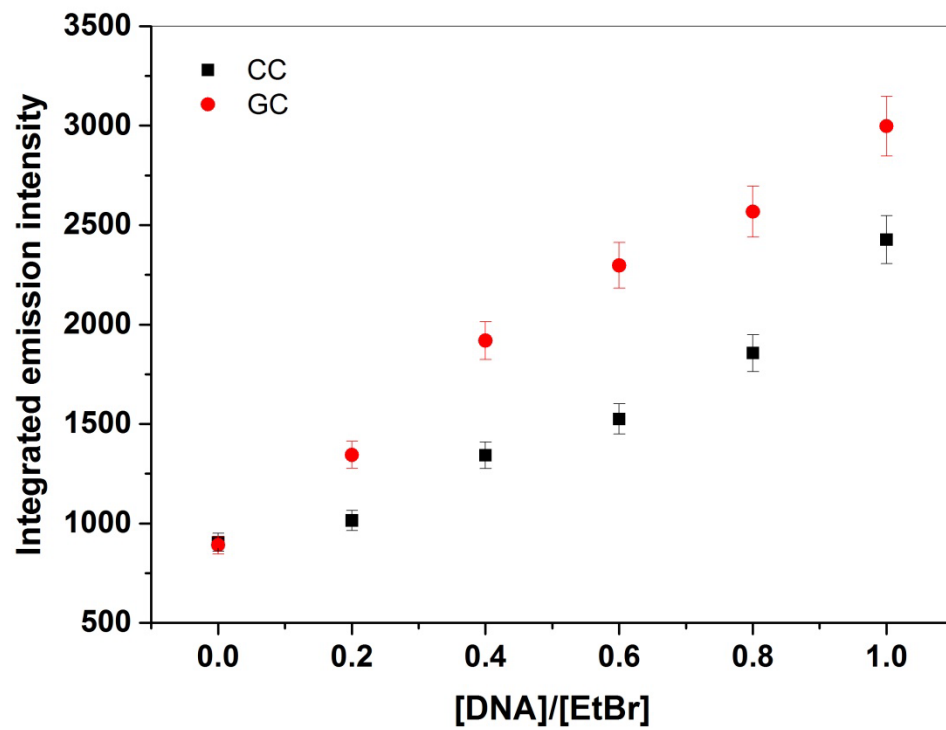

**Fig. S3** Plot of integrated emission intensity of ethidium bromide (EtBr) with GC and CC mismatch

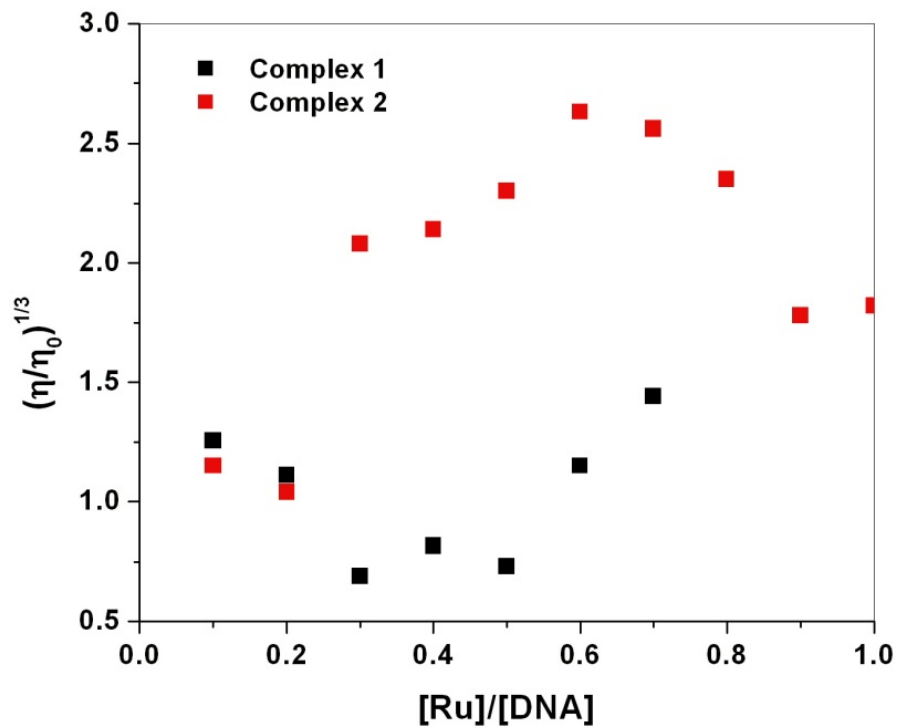

**Fig. S4** Hydrodynamic studies of CT DNA in the presence of complexes **1** (black) and **2** (red). [DNA]: 100  $\mu$ M; [Ru]: 0-100  $\mu$ M
